# Supplementary material for: G1 Cell Cycle Arrest and Extrinsic Apoptotic Mechanisms Underlying the Anti-Leukemic Activity of CDK7 Inhibitor BS-181
Source: MDPI journal article supplement (doi:10.3390/cancers12123845), 2020-12-19

## Original western blot data in Fig. 2

**e**

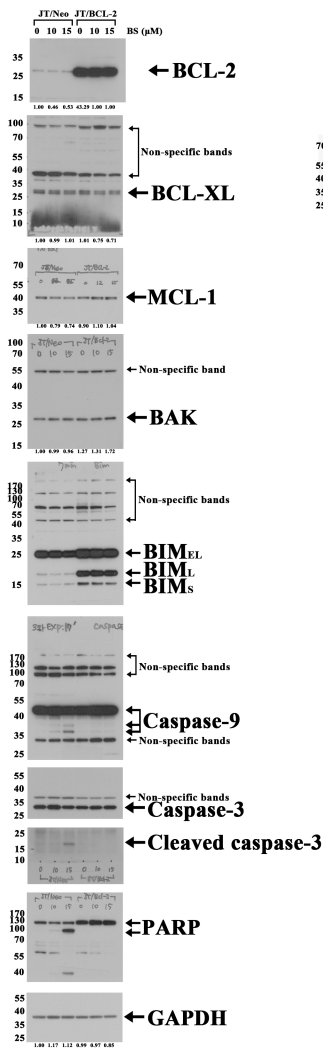

**f**

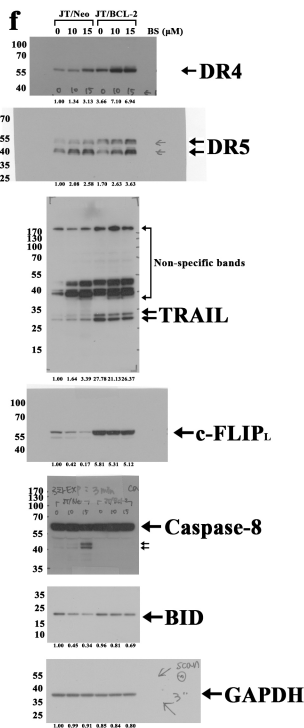

# Original western blot data in Fig. 4

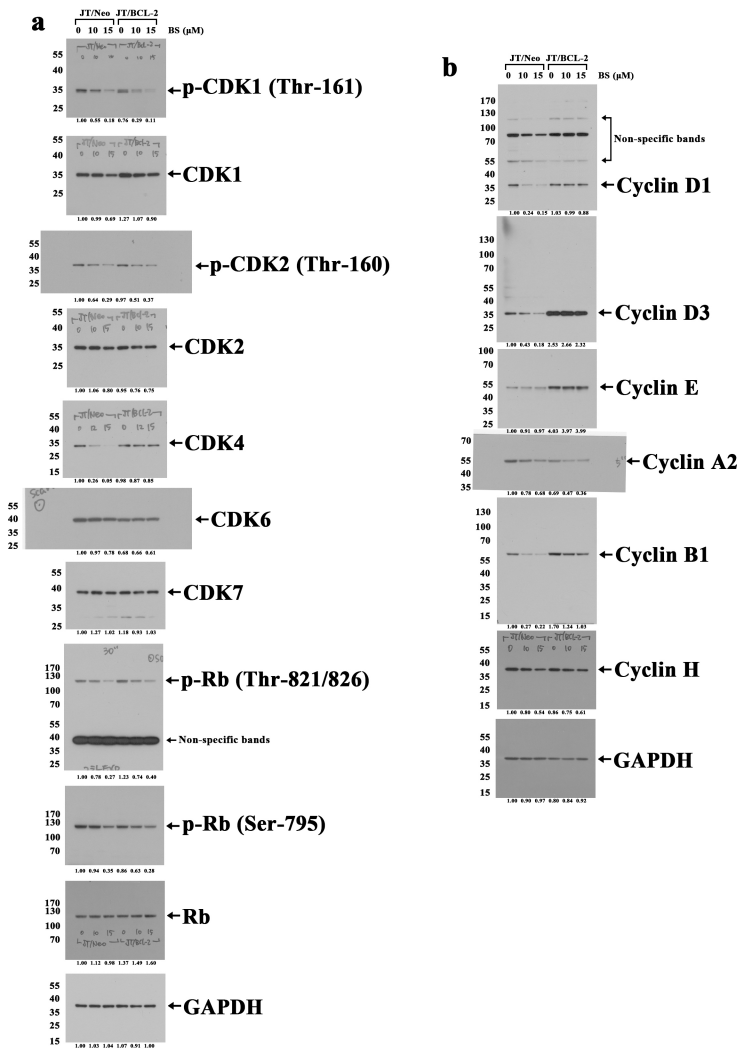

# Original western blot data in Fig. 5

**e**

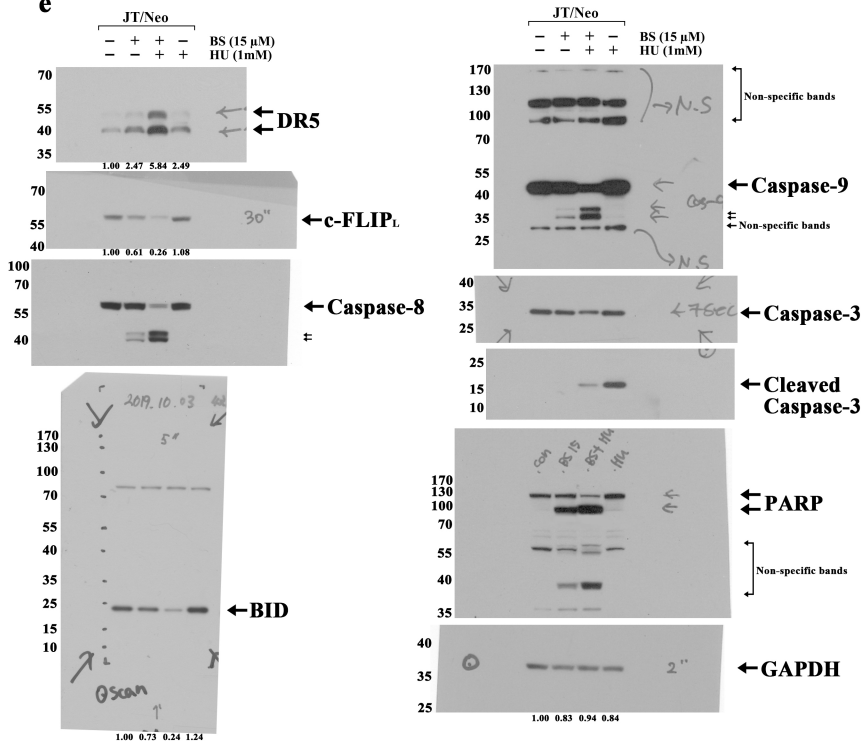

# Original western blot data in Fig. 7

**h**

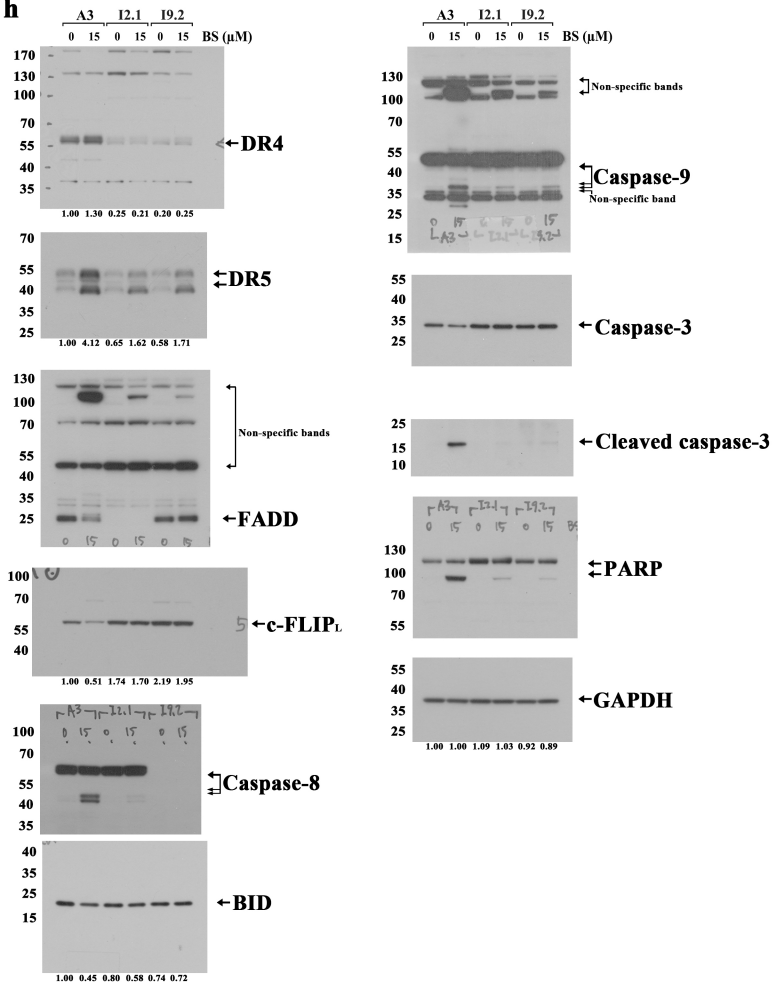

## Original western blot data in Fig. 8

**h**

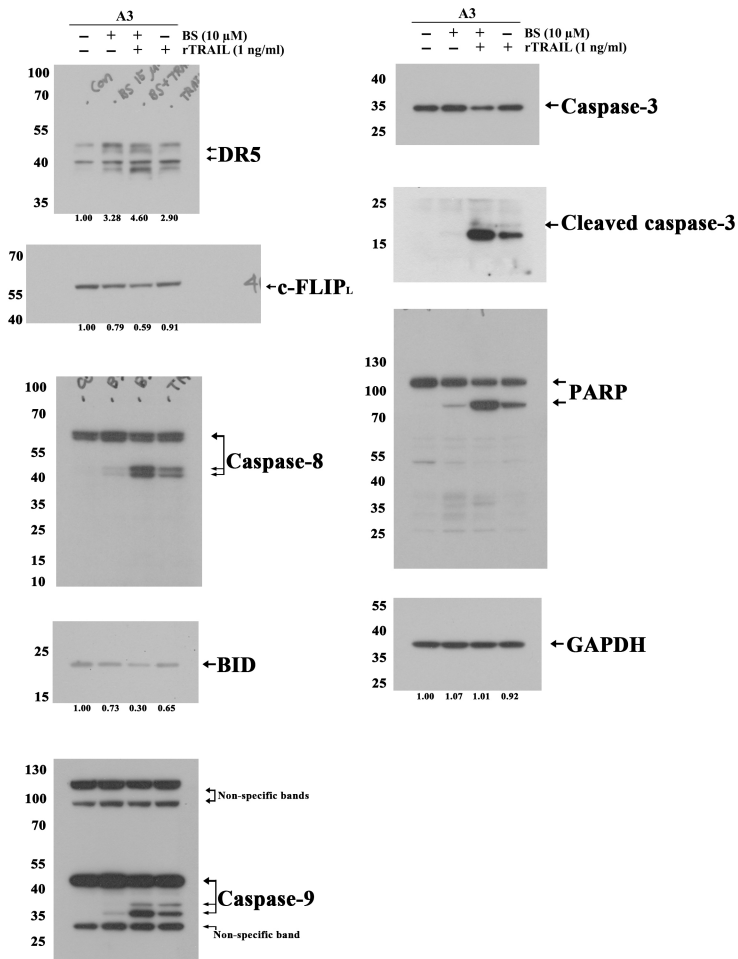

Supplement: s1 [file s1]
