# Supplementary material for: G1 Cell Cycle Arrest and Extrinsic Apoptotic Mechanisms Underlying the Anti-Leukemic Activity of CDK7 Inhibitor BS-181
Source: MDPI journal article supplement (doi:10.3390/cancers12123845), 2020-12-19
Supplement: s1 [file s1]

# Supplementary Materials:

## G<sub>1</sub> Cell Cycle Arrest and Extrinsic Apoptotic Mechanisms Underlying the Anti-Leukemic Activity of CDK7 Inhibitor BS-181

Shin Young Park <sup>1</sup>, Ki Yun Kim <sup>1</sup>, Do Youn Jun <sup>2</sup>, Su-Kyeong Hwang <sup>2,3</sup> and Young Ho Kim <sup>1,\*</sup>

### Supplementary 1.

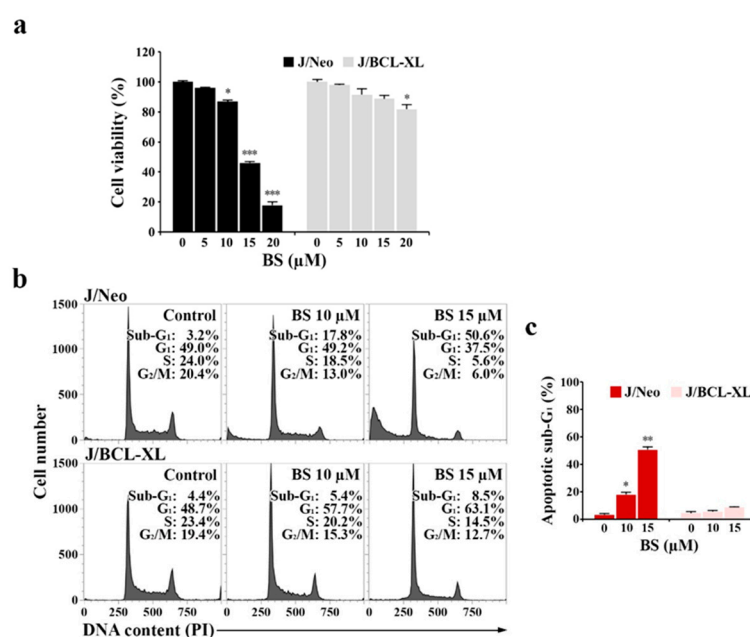

**Supplementary Figure S1.** Effect of BS-181 on cell viability, cell cycle distribution in Jurkat T cell clones transfected with the empty vector (J/Neo cells) or the *BCL-XL* expression vector (J/BCL-XL cells). (a) Cell viability was determined by incubating each cell type ( $5 \times 10^4$  cells/well) with the indicated concentrations of BS-181 in a 96-well plate for 20 h and with MTT solution for an additional 4 h. Mean  $\pm$  SD ( $n = 3$  with three replicates per independent experiment). \* $P < 0.05$ , \*\*\* $P < 0.005$ , compared with the control; (b–c) Equivalent cultures were prepared for analysis of cell cycle distribution by flow cytometry as described in Materials and Methods. BS: BS-181. Mean  $\pm$  SD of triplicate experiments. \* $P < 0.05$ , \*\* $P < 0.01$ , compared with the control.

## Supplementary 2.

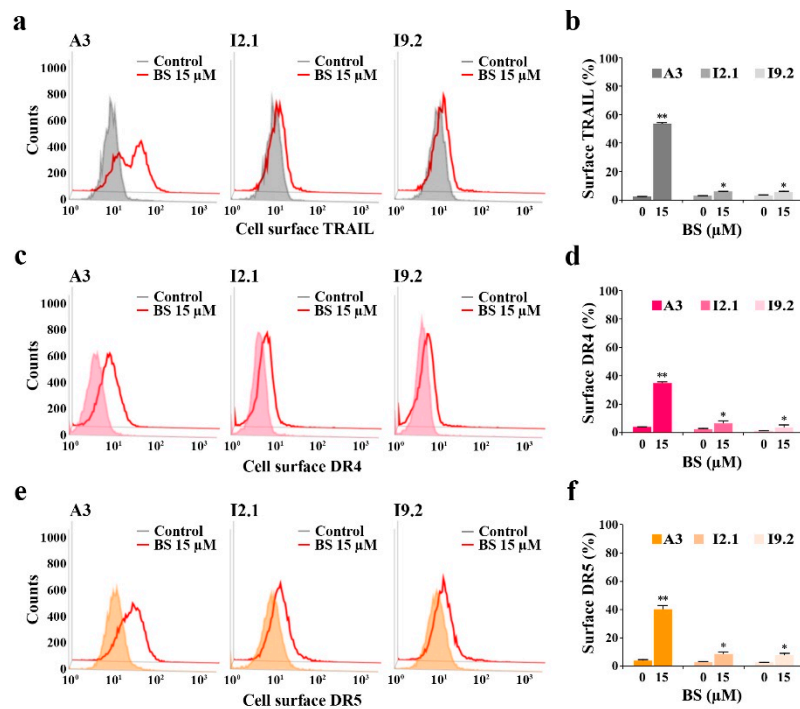

**Supplementary Figure S2.** Differential effect of BS-181 on cell surface TRAIL, DR4, and DR5 levels in wild-type A3, FADD-deficient I2.1, and caspase-8-deficient I9.2 Jurkat T cell clones. (a-f) After individual Jurkat T cell clones were exposed to 10 or 15  $\mu$ M BS-181 for 24 h, cells were treated with anti-TRAIL, BV421-conjugated anti-DR4, or Alexa Fluor 647-labeled anti-DR5 antibody for 45 min on ice. The cells treated with anti-TRAIL antibody were rinsed and treated with Alexa Fluor 488-labeled anti-rabbit IgG antibody for an additional 30 min on ice. After fixation in 1% paraformaldehyde/PBS, TRAIL-, DR4-, or DR5-positive cells were measured by flow cytometry. BS: BS-181. A representative result is shown; two additional experiments yielded similar results. Mean  $\pm$  SD of triplicate experiments. \* $P$  < 0.05, \*\* $P$  < 0.01, compared with the control.

### Supplementary 3.

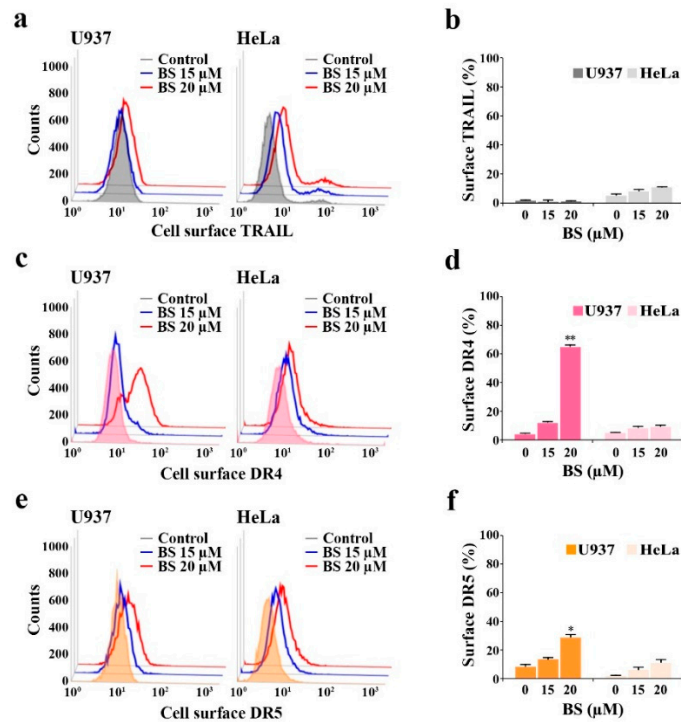

**Supplementary Figure S3.** Effect of BS-181 on cell surface TRAIL, DR4, and DR5 levels in U937 and HeLa cells. (a-f) After U937 ( $5 \times 10^5$  cells/mL) or HeLa cells ( $1.7 \times 10^5$  cells/mL) were exposed to 15 or 20  $\mu$ M BS-181 for 24 h, the cells were treated with the anti-TRAIL, BV421-conjugated anti-DR4, or Alexa Fluor 647-labeled anti-DR5 antibody for 45 min on ice. The cells treated with anti-TRAIL antibody were rinsed and treated with Alexa Fluor 488-labeled anti-rabbit IgG antibody for an additional 30 min on ice. After fixation in 1% paraformaldehyde/PBS, TRAIL-, DR4-, or DR5-positive cells were measured by flow cytometry. BS: BS-181. A representative result is shown; two additional experiments yielded similar results. Mean  $\pm$  SD of triplicate experiments. \* $P < 0.05$ , \*\* $P < 0.01$ , compared with the control.
